# Supplementary material
Source: PubMed Central journal article supplement (PMC3836256)
Supplement: NIHMS54165-supplement-Supplementary_figure_A.pdf [file NIHMS54165-supplement-Supplementary_figure_A.pdf]

# Plasmodium falciparum clone 3D7 Chromosome 1

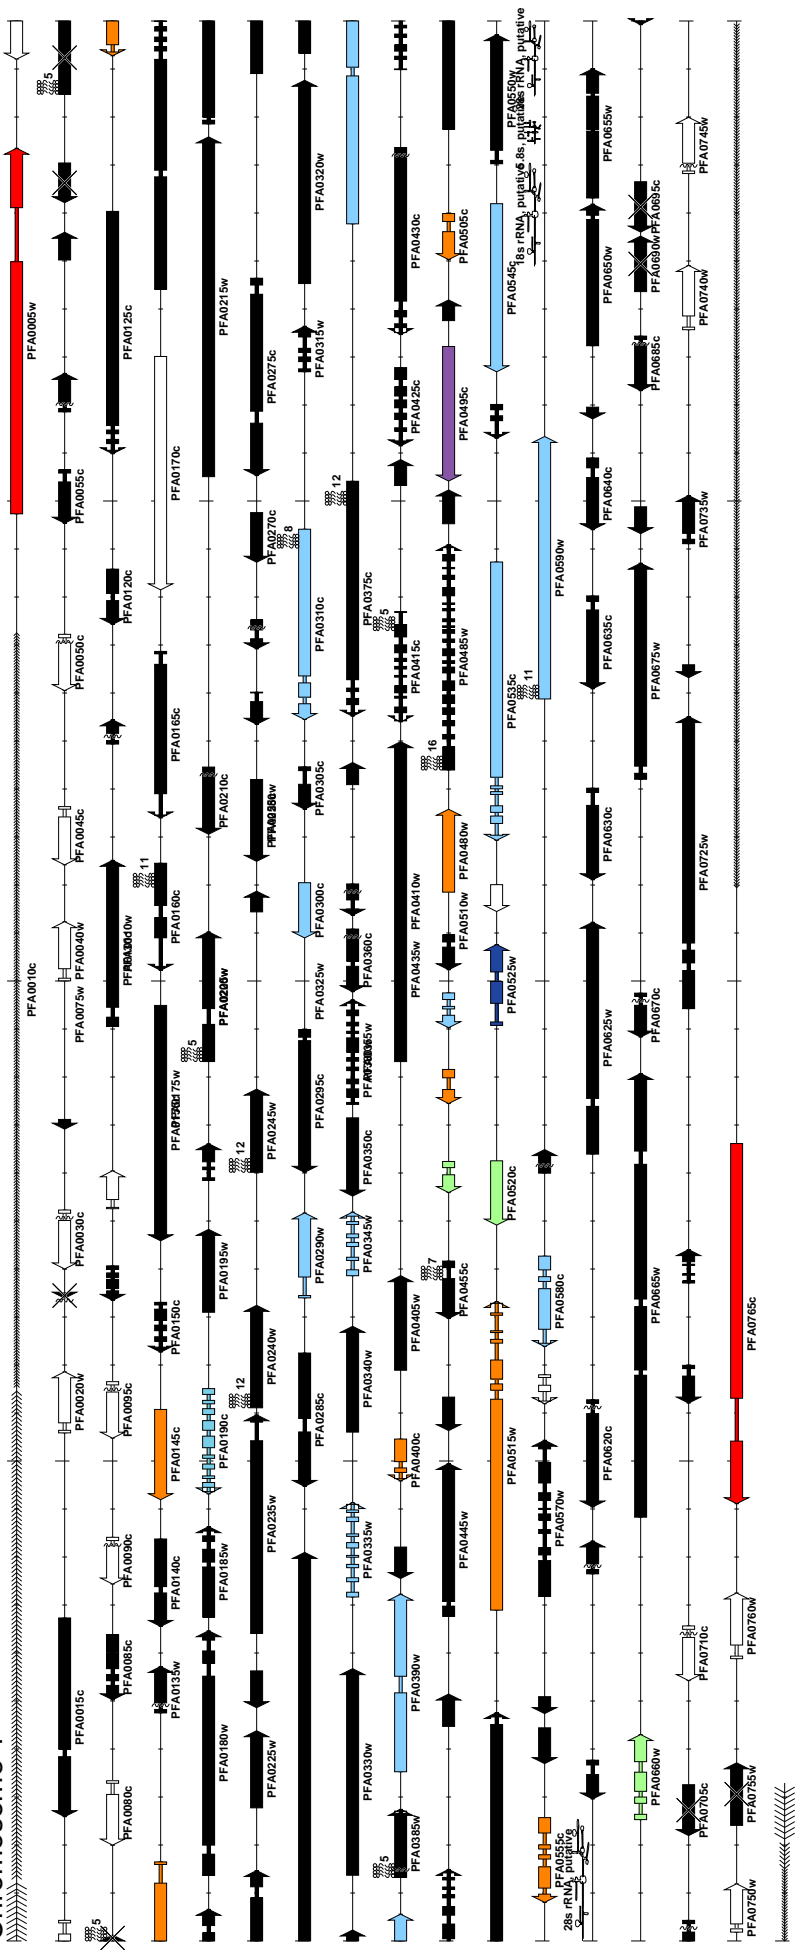

## FUNCTION

|  |                          |  |                           |  |                            |
|--|--------------------------|--|---------------------------|--|----------------------------|
|  | enzyme                   |  | chaperone                 |  | other function             |
|  | enzyme regulator         |  | transporter               |  | molecular function unknown |
|  | defense/immunity protein |  | ligand binding or carrier |  | no assignment              |
|  | structural molecule      |  | transcription regulator   |  | translation regulator      |
|  | cell adhesion molecule   |  |                           |  |                            |

|                                |                |
|--------------------------------|----------------|
| <br>Telomeric regions          | <br>RNAs       |
| <br>Transmembrane<br>5 domains | <br>Pseudogene |
