# Supplementary material
Source: PubMed Central journal article supplement (PMC3836256)
Supplement: NIHMS54165-supplement-Supplementary_figure_C.pdf [file NIHMS54165-supplement-Supplementary_figure_C.pdf]

# Plasmodium falciparum clone 3D7 Chromosome 3

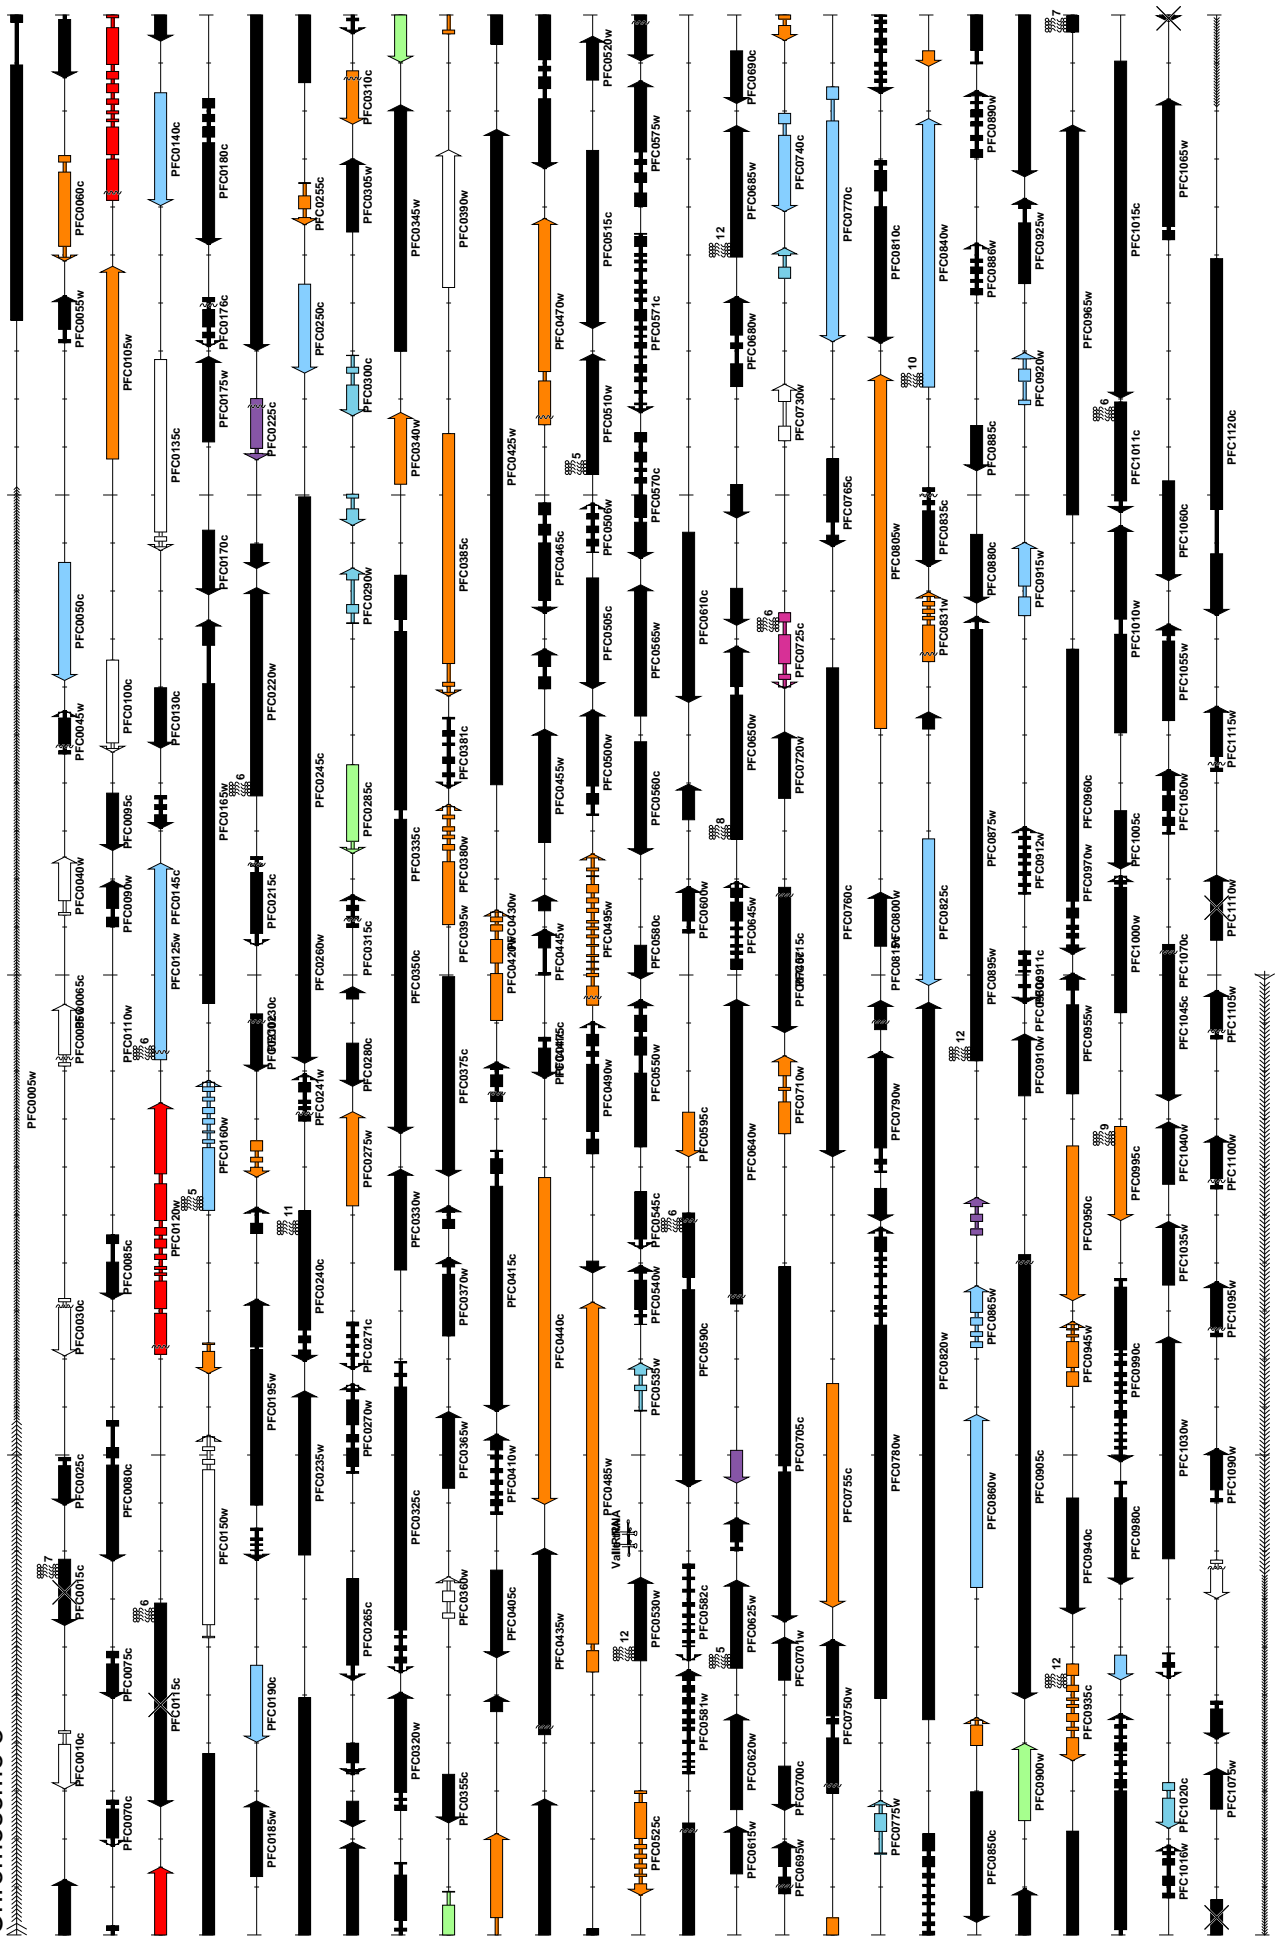

| FUNCTION                                                                            |                            |
|-------------------------------------------------------------------------------------|----------------------------|
|  | enzyme                     |
|  | enzyme regulator           |
|  | defense/immunity protein   |
|  | structural molecule        |
|  | cell adhesion molecule     |
|  | chaperone                  |
|  | transporter                |
|  | ligand binding or carrier  |
|  | transcription regulator    |
|  | translation regulator      |
|  | other function             |
|  | molecular function unknown |
|  | no assignment              |

| Telomeric regions                                                                                                                                                                                                                                                                                                                                                                                                | RNAs                                                                                                                                                                                                                                                                                              |
|------------------------------------------------------------------------------------------------------------------------------------------------------------------------------------------------------------------------------------------------------------------------------------------------------------------------------------------------------------------------------------------------------------------|---------------------------------------------------------------------------------------------------------------------------------------------------------------------------------------------------------------------------------------------------------------------------------------------------|
| <br>SB-1<br><br>SB-2<br><br>SB-3<br><br>Transmembrane<br><b>5</b><br>domains | RNAs<br><br>tRNA<br><br>rRNA<br><br>Pseudogene |
