# Supplementary material
Source: PubMed Central journal article supplement (PMC3836256)

# Plasmodium falciparum clone 3D7 Chromosome 4

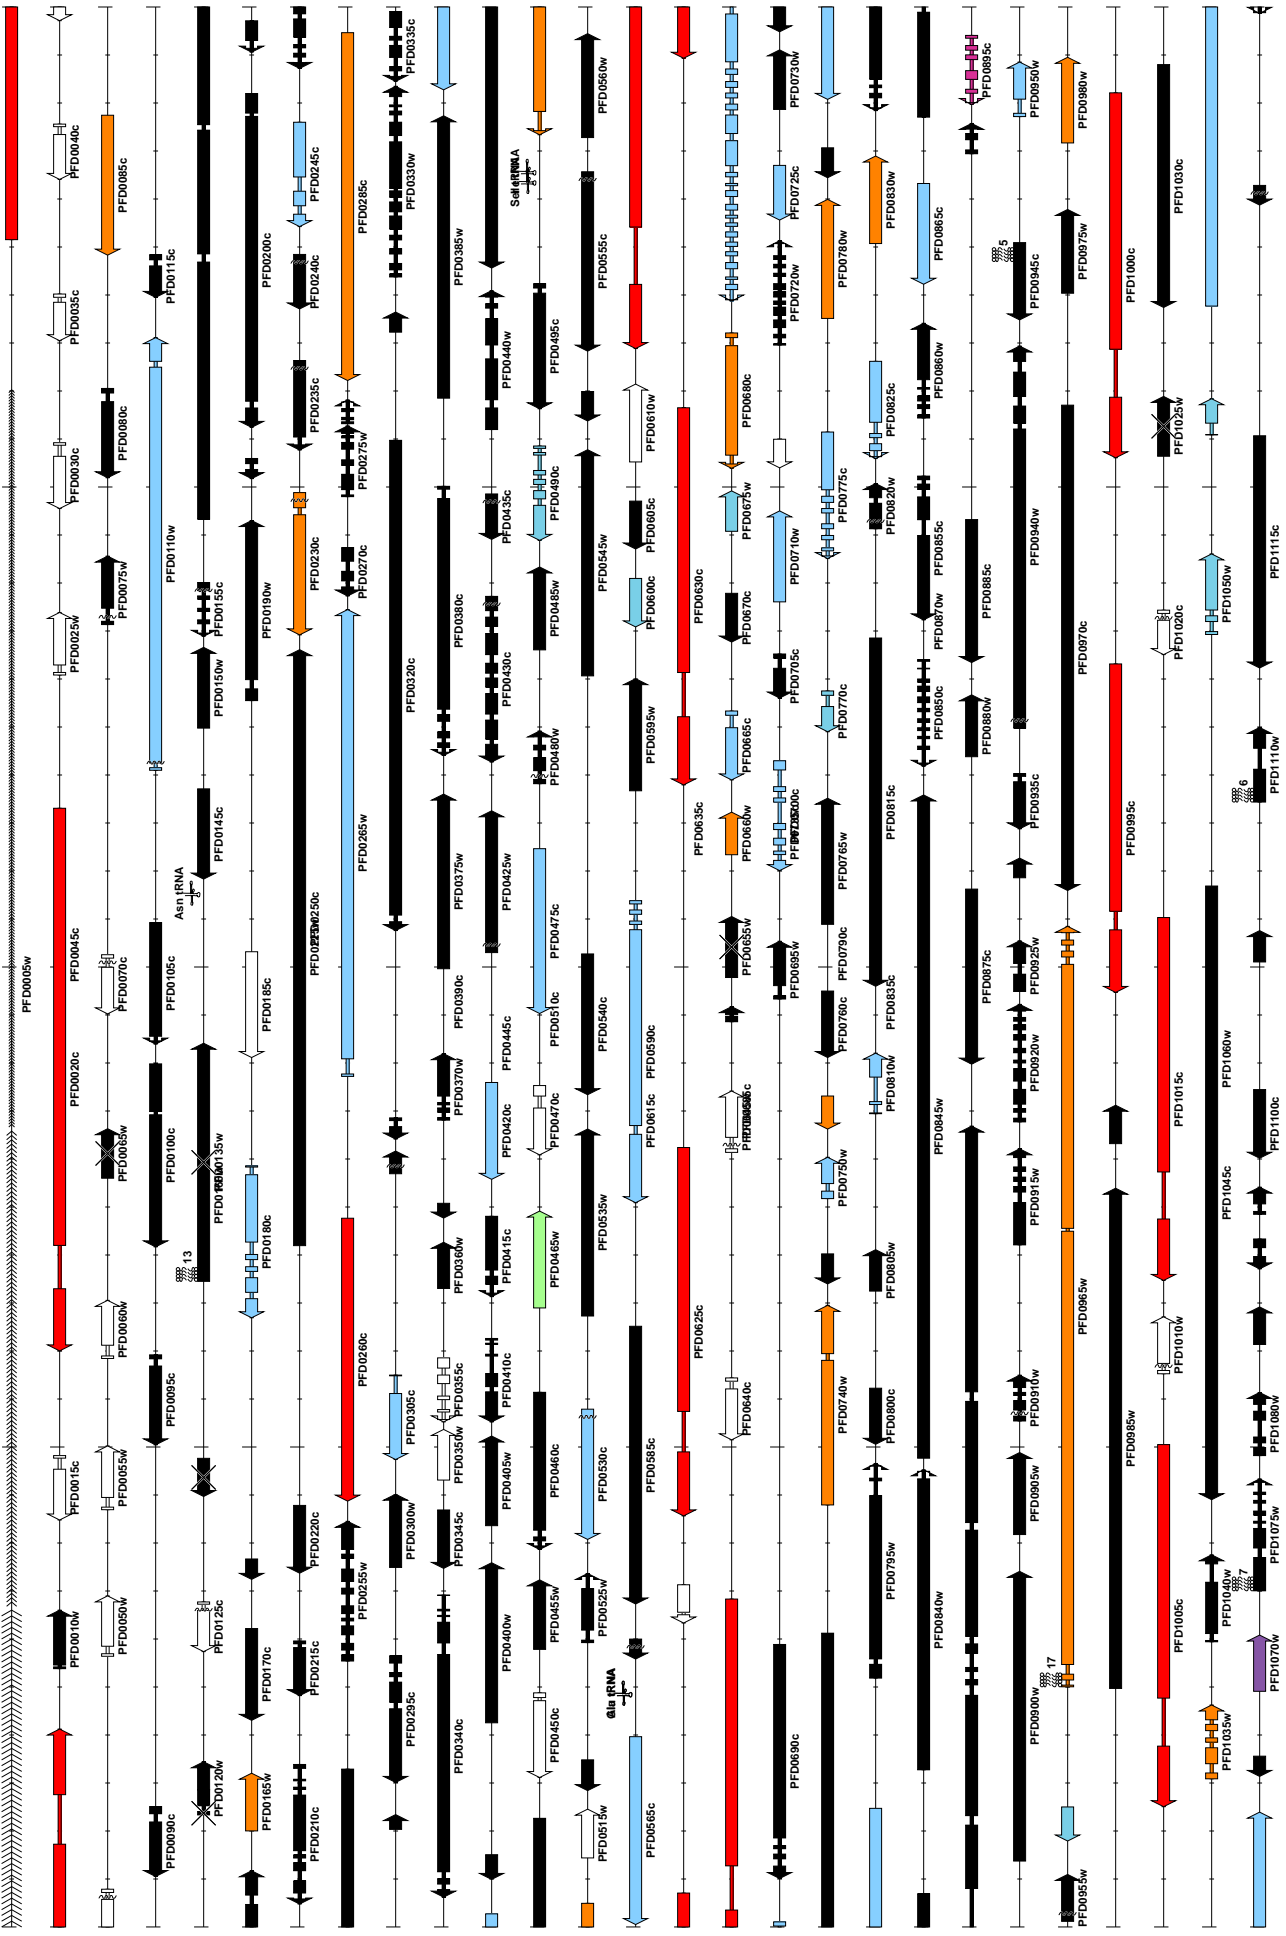

Supplement: NIHMS54165-supplement-Supplementary_figure_D.pdf [file NIHMS54165-supplement-Supplementary_figure_D.pdf]
