# Supplementary material
Source: PubMed Central journal article supplement (PMC3836256)
Supplement: NIHMS54165-supplement-Supplementary_figure_H.pdf [file NIHMS54165-supplement-Supplementary_figure_H.pdf]

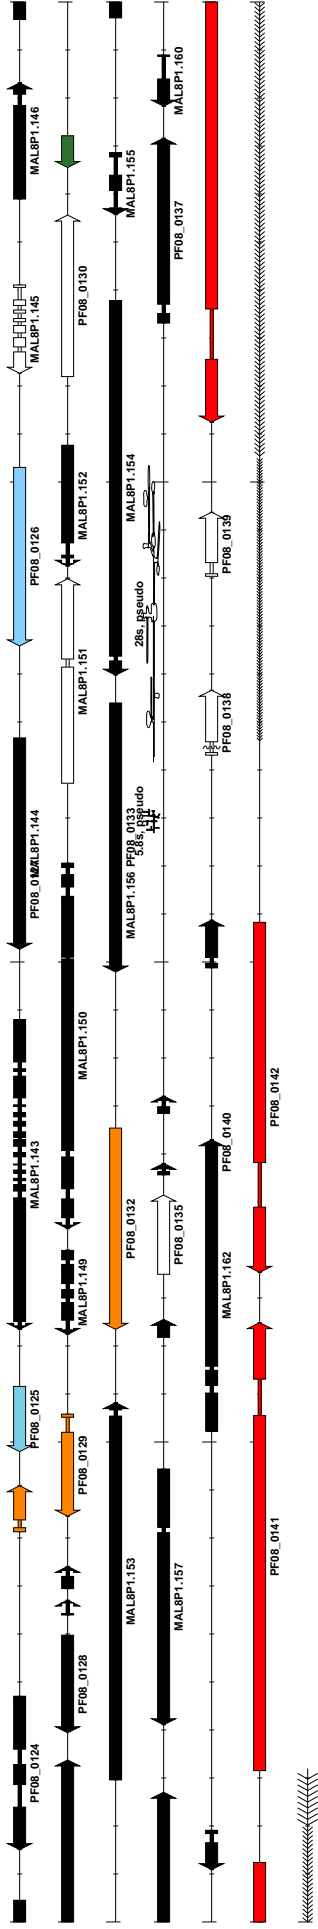

| FUNCTION |                            |
|----------|----------------------------|
|          | enzyme                     |
|          | enzyme regulator           |
|          | defense/immunity protein   |
|          | structural molecule        |
|          | cell adhesion molecule     |
|          | chaperone                  |
|          | transporter                |
|          | ligand binding or carrier  |
|          | transcription regulator    |
|          | translation regulator      |
|          | other function             |
|          | molecular function unknown |
|          | no assignment              |

|                                                      |                                 |
|------------------------------------------------------|---------------------------------|
| <b>Telomeric regions</b><br><br>SB-1<br>SB-2<br>SB-3 | <b>RNAs</b><br><br>tRNA<br>rRNA |
| <b>Transmembrane 5 domains</b><br>                   | <b>Pseudogene</b><br>           |
