# Supplementary material
Source: PubMed Central journal article supplement (PMC3836256)
Supplement: NIHMS54165-supplement-Supplementary_figure_I.pdf [file NIHMS54165-supplement-Supplementary_figure_I.pdf]

# Plasmodium falciparum clone 3D7 Chromosome 9

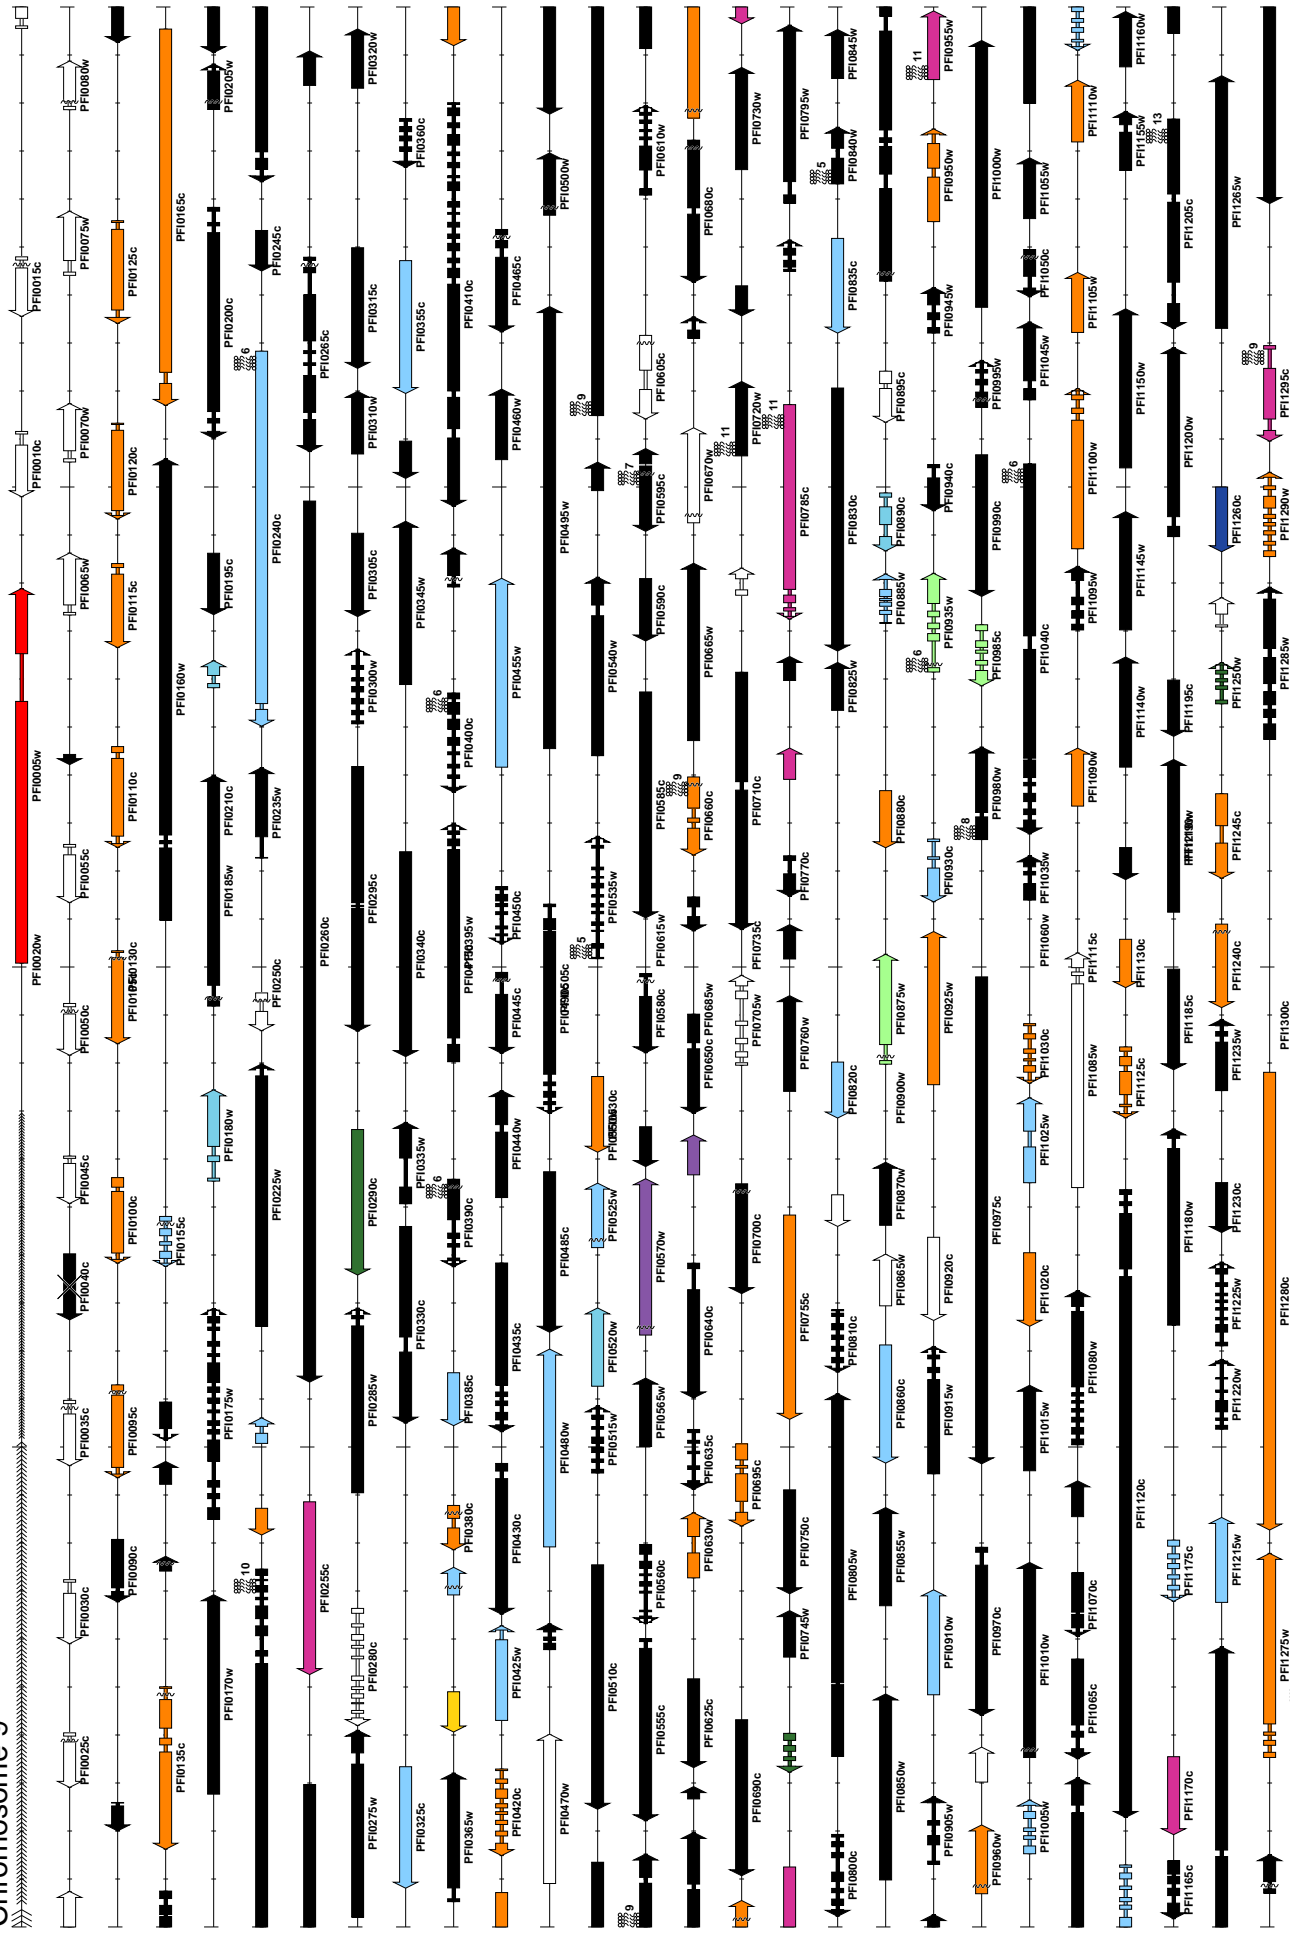

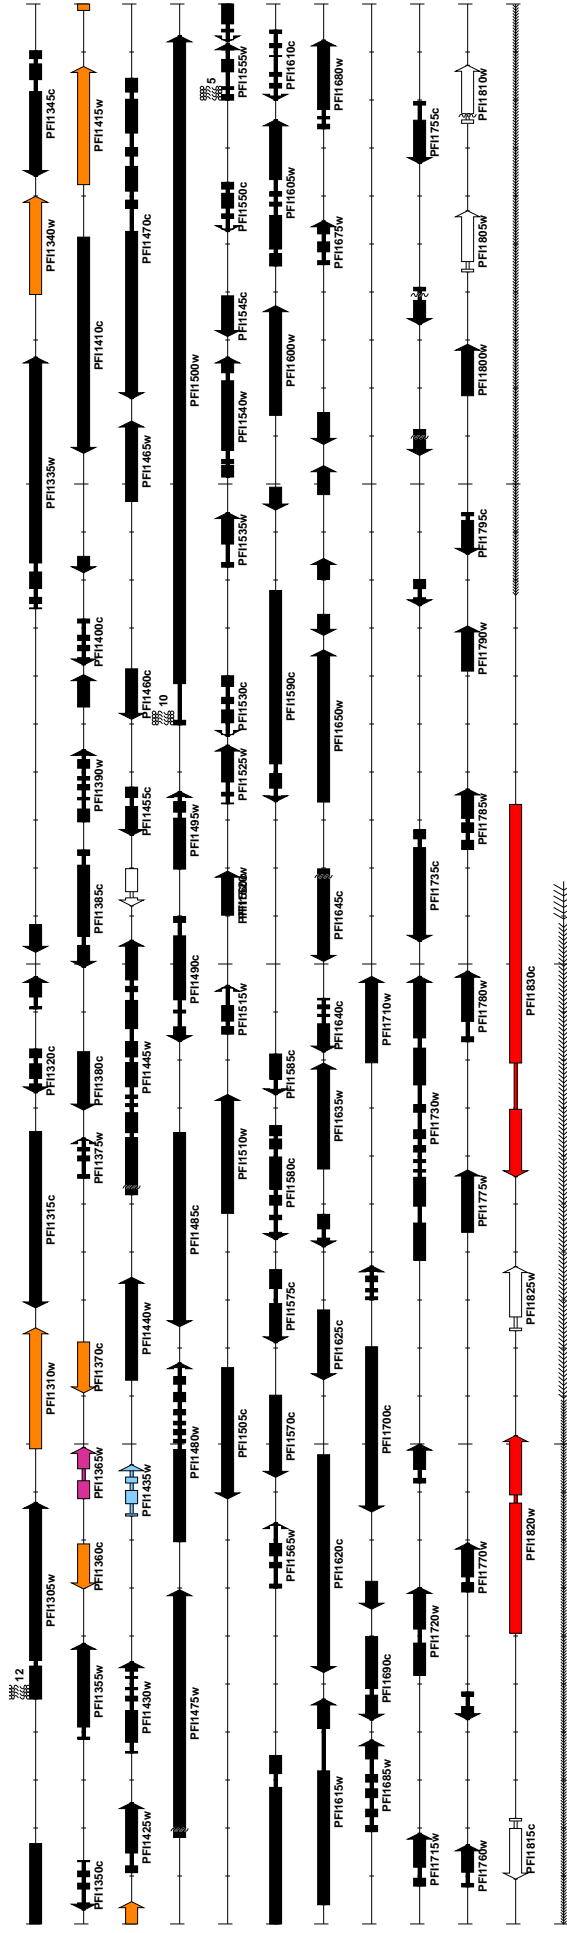

| FUNCTION |                            |
|----------|----------------------------|
|          | enzyme                     |
|          | chaperone                  |
|          | enzyme regulator           |
|          | transporter                |
|          | defense/immunity protein   |
|          | structural molecule        |
|          | cell adhesion molecule     |
|          | ligand binding or carrier  |
|          | transcription regulator    |
|          | translation regulator      |
|          | other function             |
|          | molecular function unknown |
|          | no assignment              |

|                                                                                           |                                                    |
|-------------------------------------------------------------------------------------------|----------------------------------------------------|
| <p>Telomeric regions</p> <p>SB-1<br/>SB-2<br/>SB-3</p> <p>Transmembrane<br/>5 domains</p> | <p>RNAs</p> <p>tRNA<br/>rRNA</p> <p>Pseudogene</p> |
|-------------------------------------------------------------------------------------------|----------------------------------------------------|
