# Supplementary material
Source: PubMed Central journal article supplement (PMC3836256)
Supplement: NIHMS54165-supplement-Supplementary_figure_J.pdf [file NIHMS54165-supplement-Supplementary_figure_J.pdf]

# Plasmodium falciparum clone 3D7 Chromosome 10

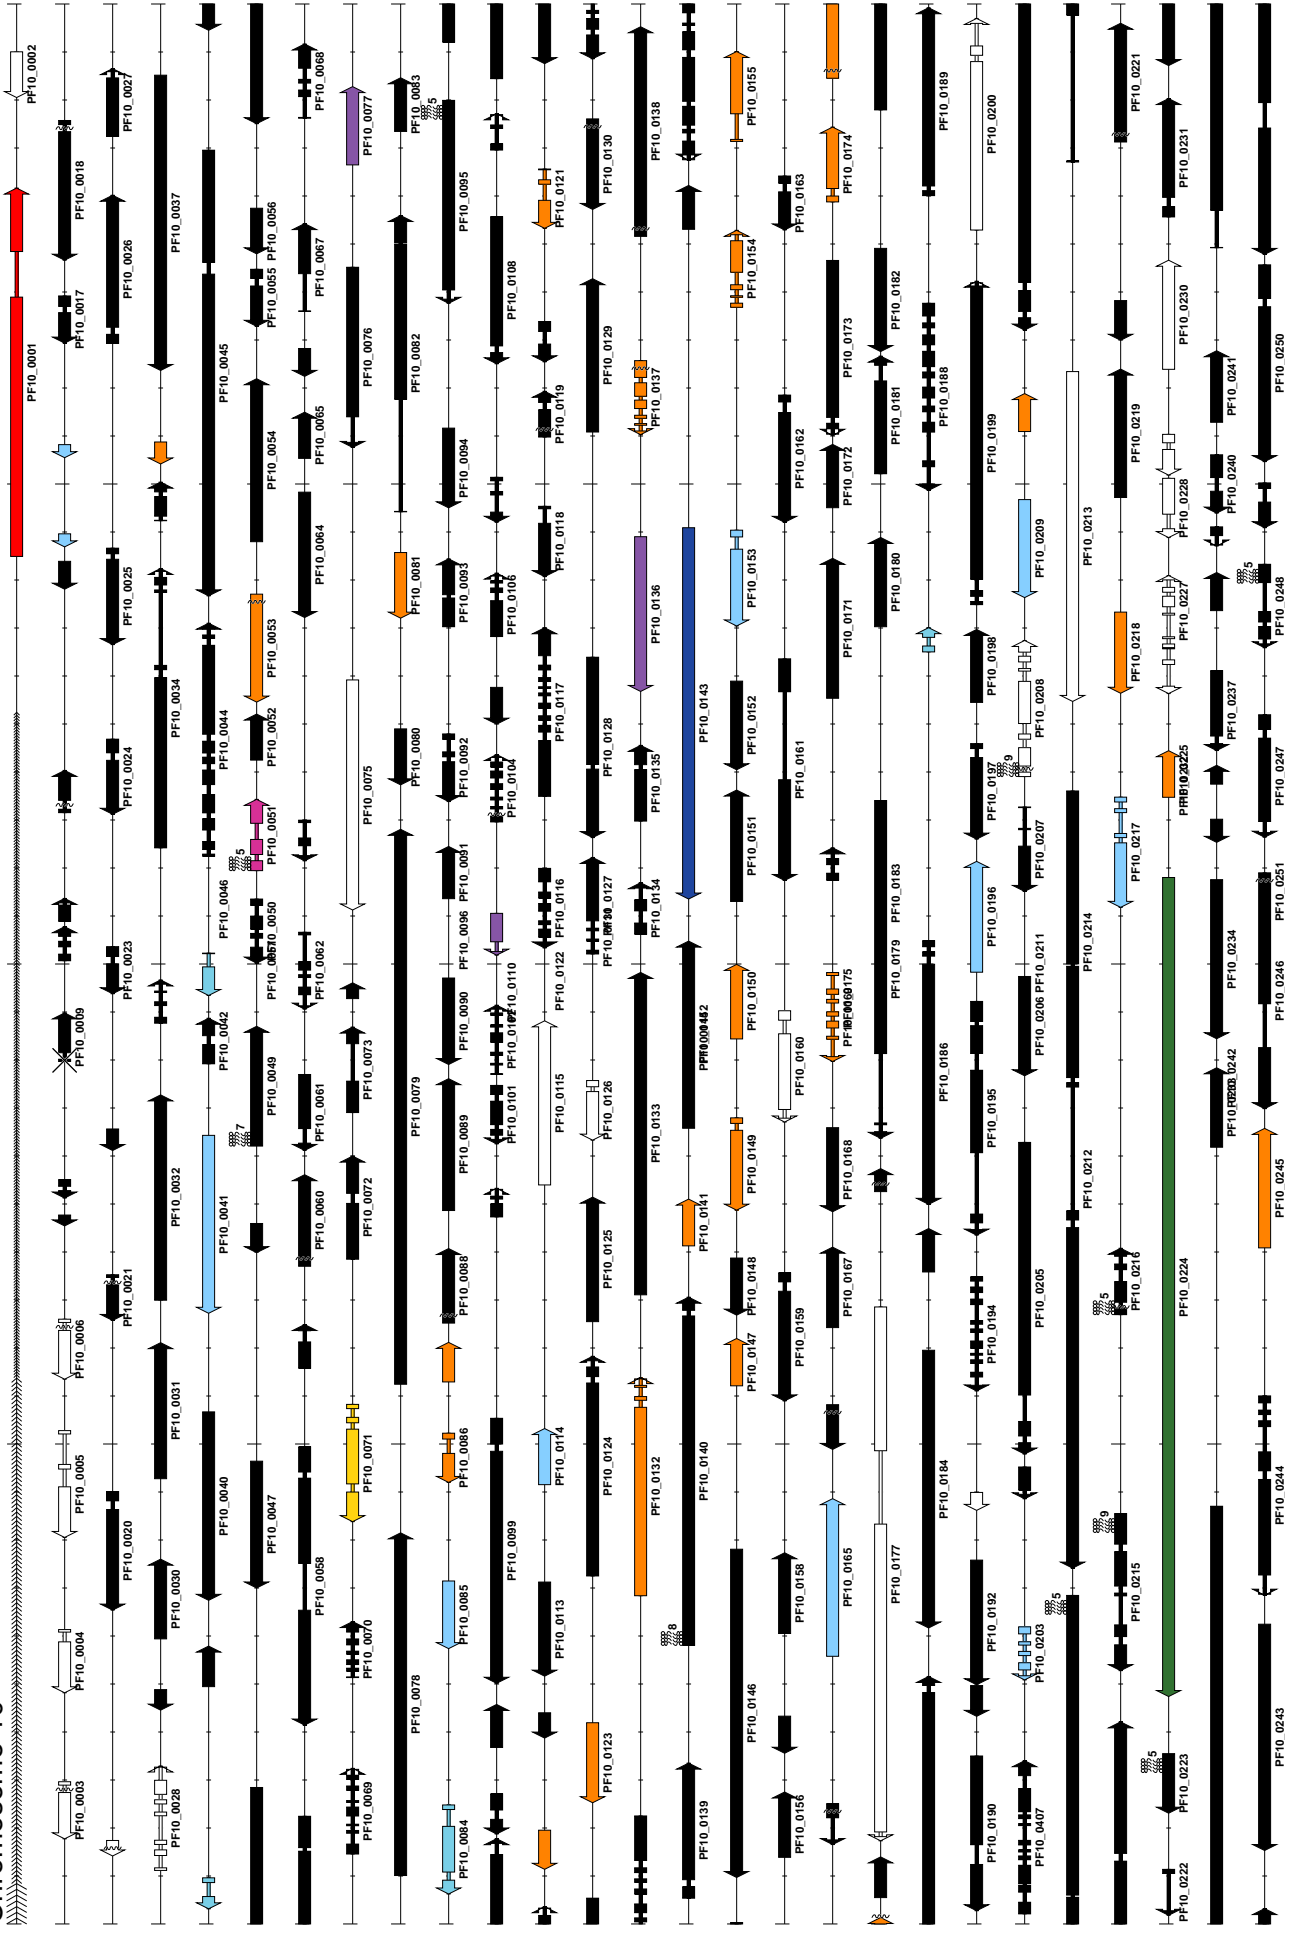

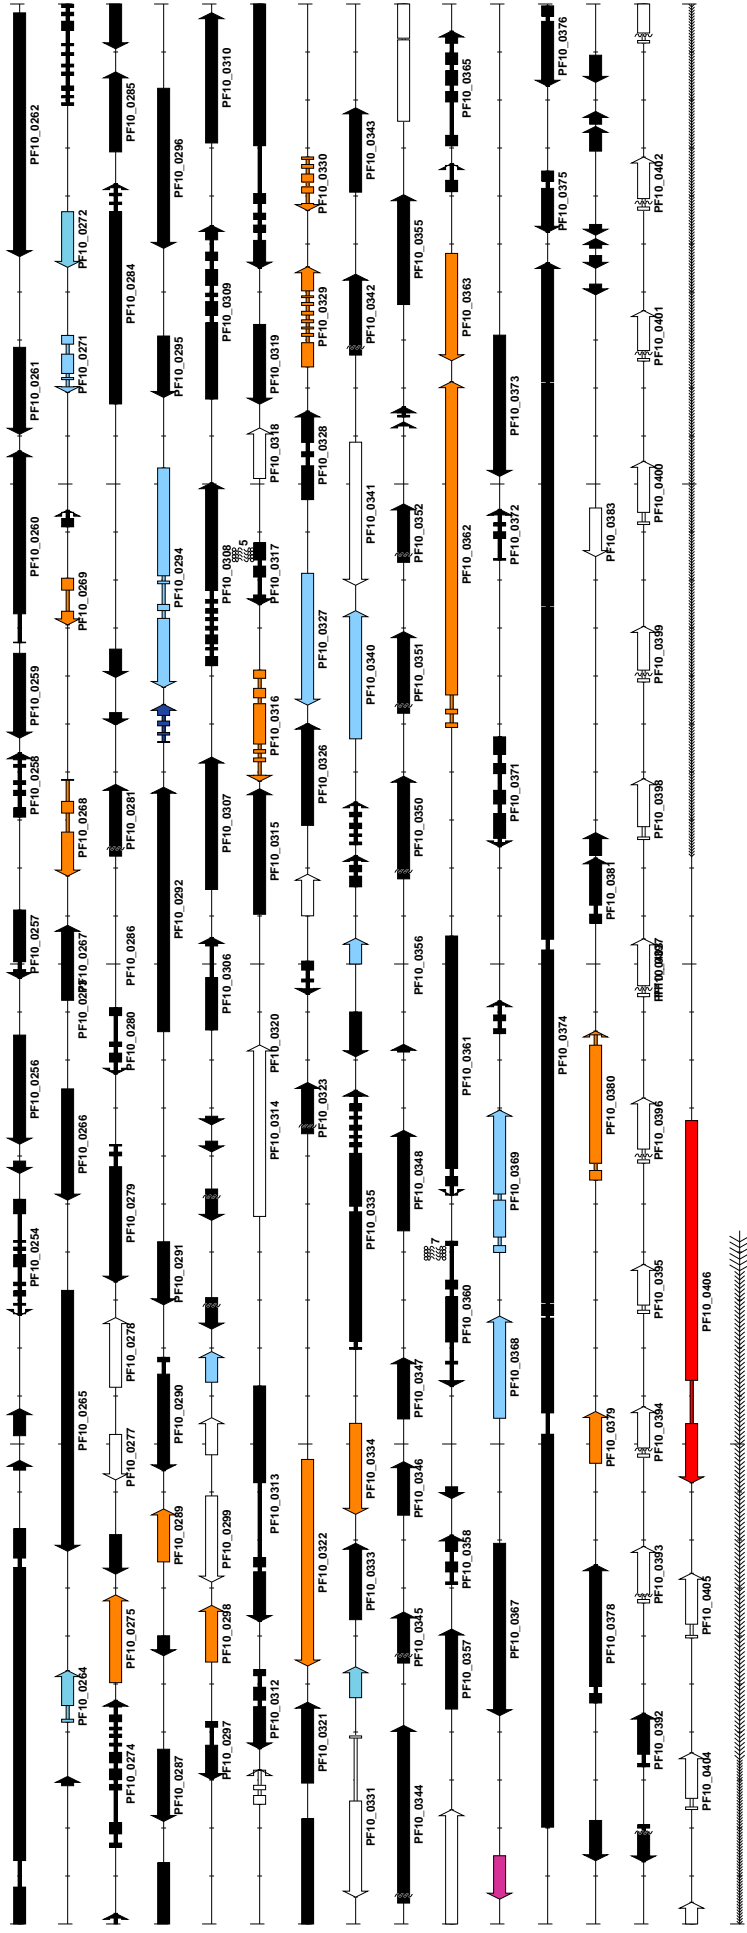

| FUNCTION |                            |
|----------|----------------------------|
|          | enzyme                     |
|          | enzyme regulator           |
|          | defense/immunity protein   |
|          | structural molecule        |
|          | cell adhesion molecule     |
|          | chaperone                  |
|          | transporter                |
|          | ligand binding or carrier  |
|          | transcription regulator    |
|          | translation regulator      |
|          | other function             |
|          | molecular function unknown |
|          | no assignment              |

| Telomeric regions              | RNAs                 |
|--------------------------------|----------------------|
| <br><br>                       | <br>tRNA<br><br>rRNA |
| <br>Transmembrane<br>5 domains | <br>Pseudogene       |
