# Supplementary material
Source: PubMed Central journal article supplement (PMC3836256)
Supplement: NIHMS54165-supplement-Supplementary_figure_K.pdf [file NIHMS54165-supplement-Supplementary_figure_K.pdf]

# Plasmodium falciparum clone 3D7 Chromosome 11

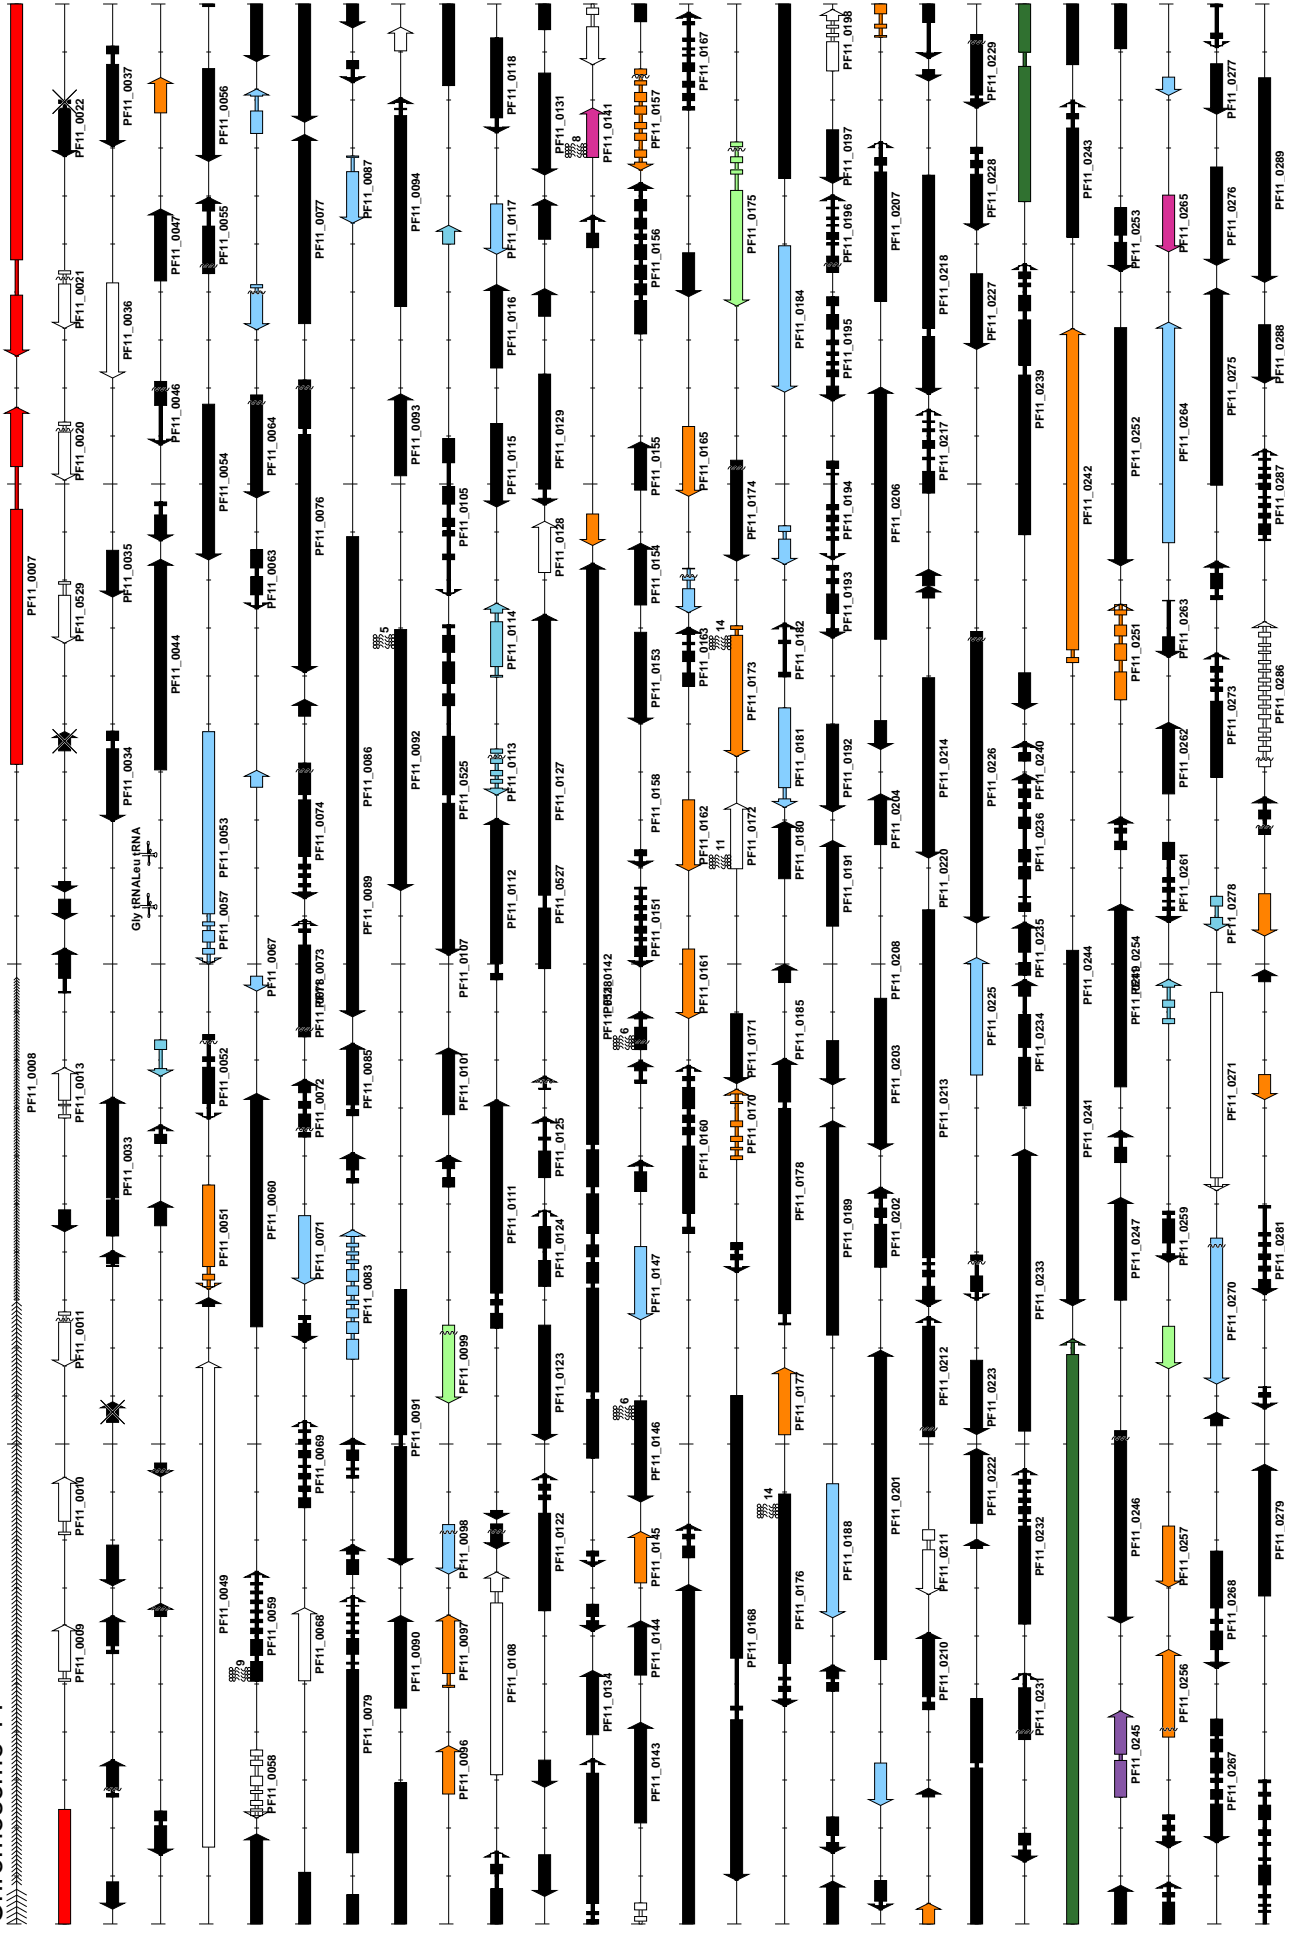

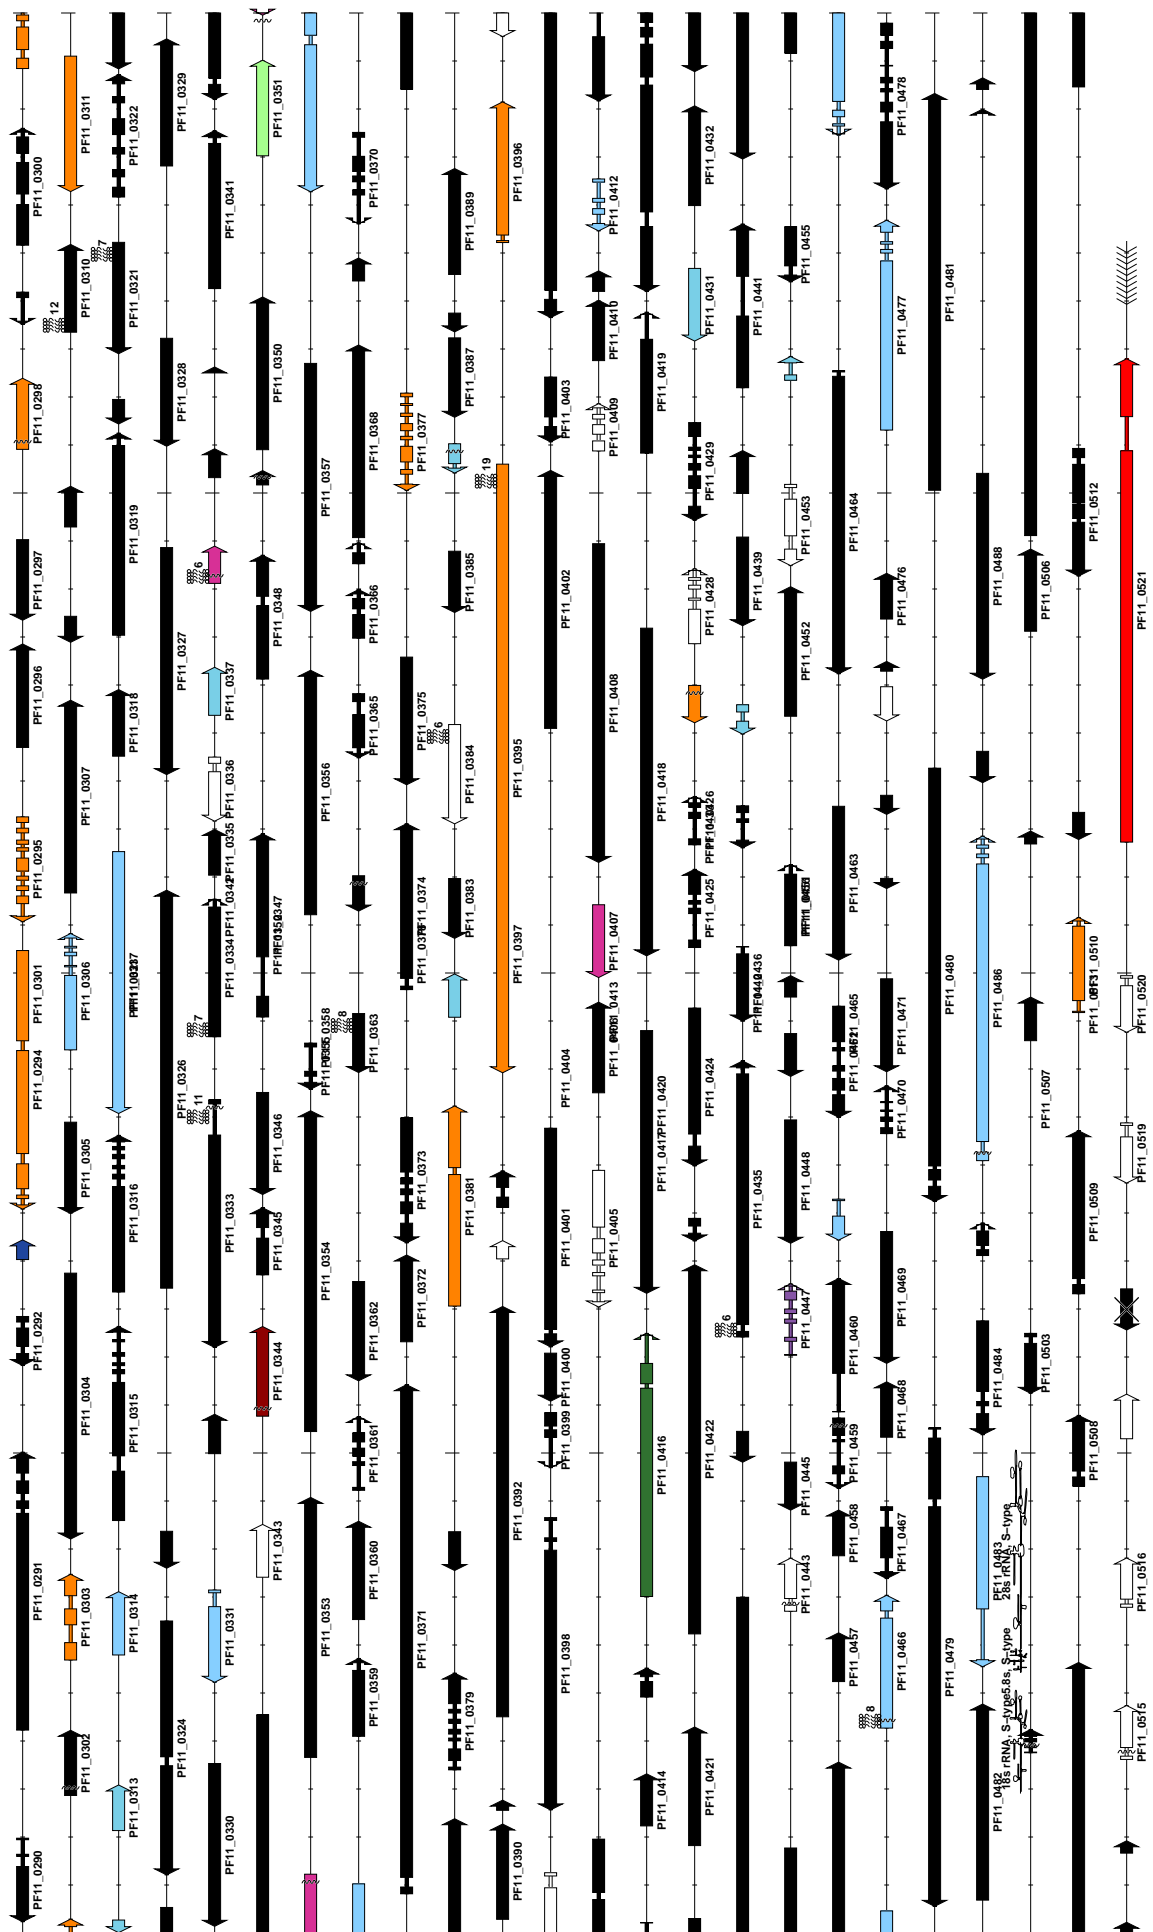

| FUNCTION                                                                            |                            |
|-------------------------------------------------------------------------------------|----------------------------|
|  | enzyme                     |
|  | enzyme regulator           |
|  | defense/immunity protein   |
|  | structural molecule        |
|  | cell adhesion molecule     |
|  | chaperone                  |
|  | transporter                |
|  | ligand binding or carrier  |
|  | transcription regulator    |
|  | translation regulator      |
|  | other function             |
|  | molecular function unknown |
|  | no assignment              |

| Telomeric regions                                                                                                                                                                                                                                                                                                                                                                                  | RNAs                                                                                                                                                                                                                                                                                   |
|----------------------------------------------------------------------------------------------------------------------------------------------------------------------------------------------------------------------------------------------------------------------------------------------------------------------------------------------------------------------------------------------------|----------------------------------------------------------------------------------------------------------------------------------------------------------------------------------------------------------------------------------------------------------------------------------------|
|  SB-1<br> SB-2<br> SB-3<br> 5 domains<br>Transmembrane domains | tRNA<br><br>rRNA<br><br> Pseudogene |
