# Supplementary material
Source: PubMed Central journal article supplement (PMC3836256)
Supplement: NIHMS54165-supplement-Supplementary_figure_M.pdf [file NIHMS54165-supplement-Supplementary_figure_M.pdf]

# Plasmodium falciparum clone 3D7 Chromosome 13

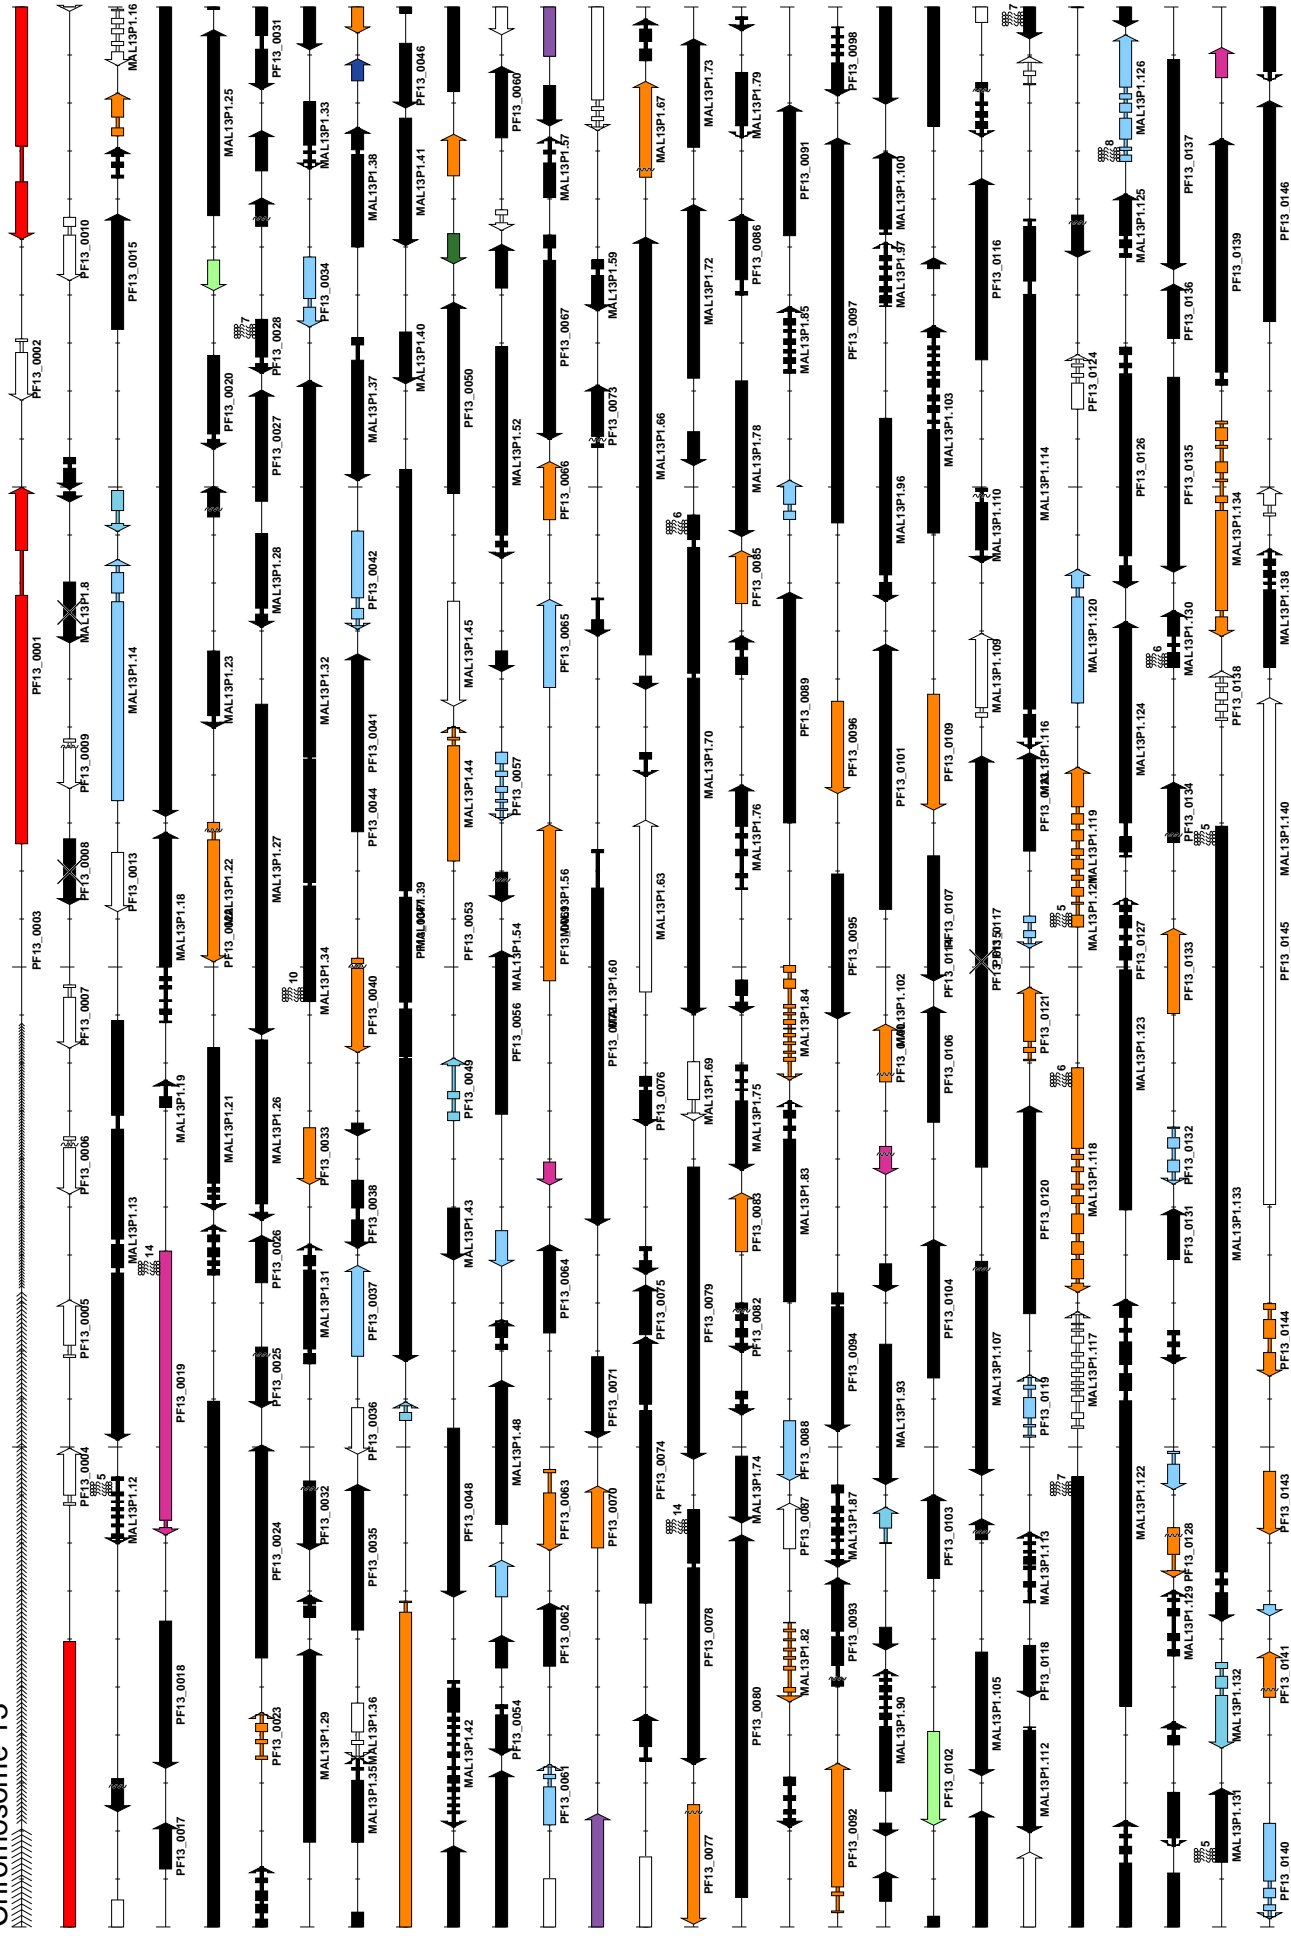

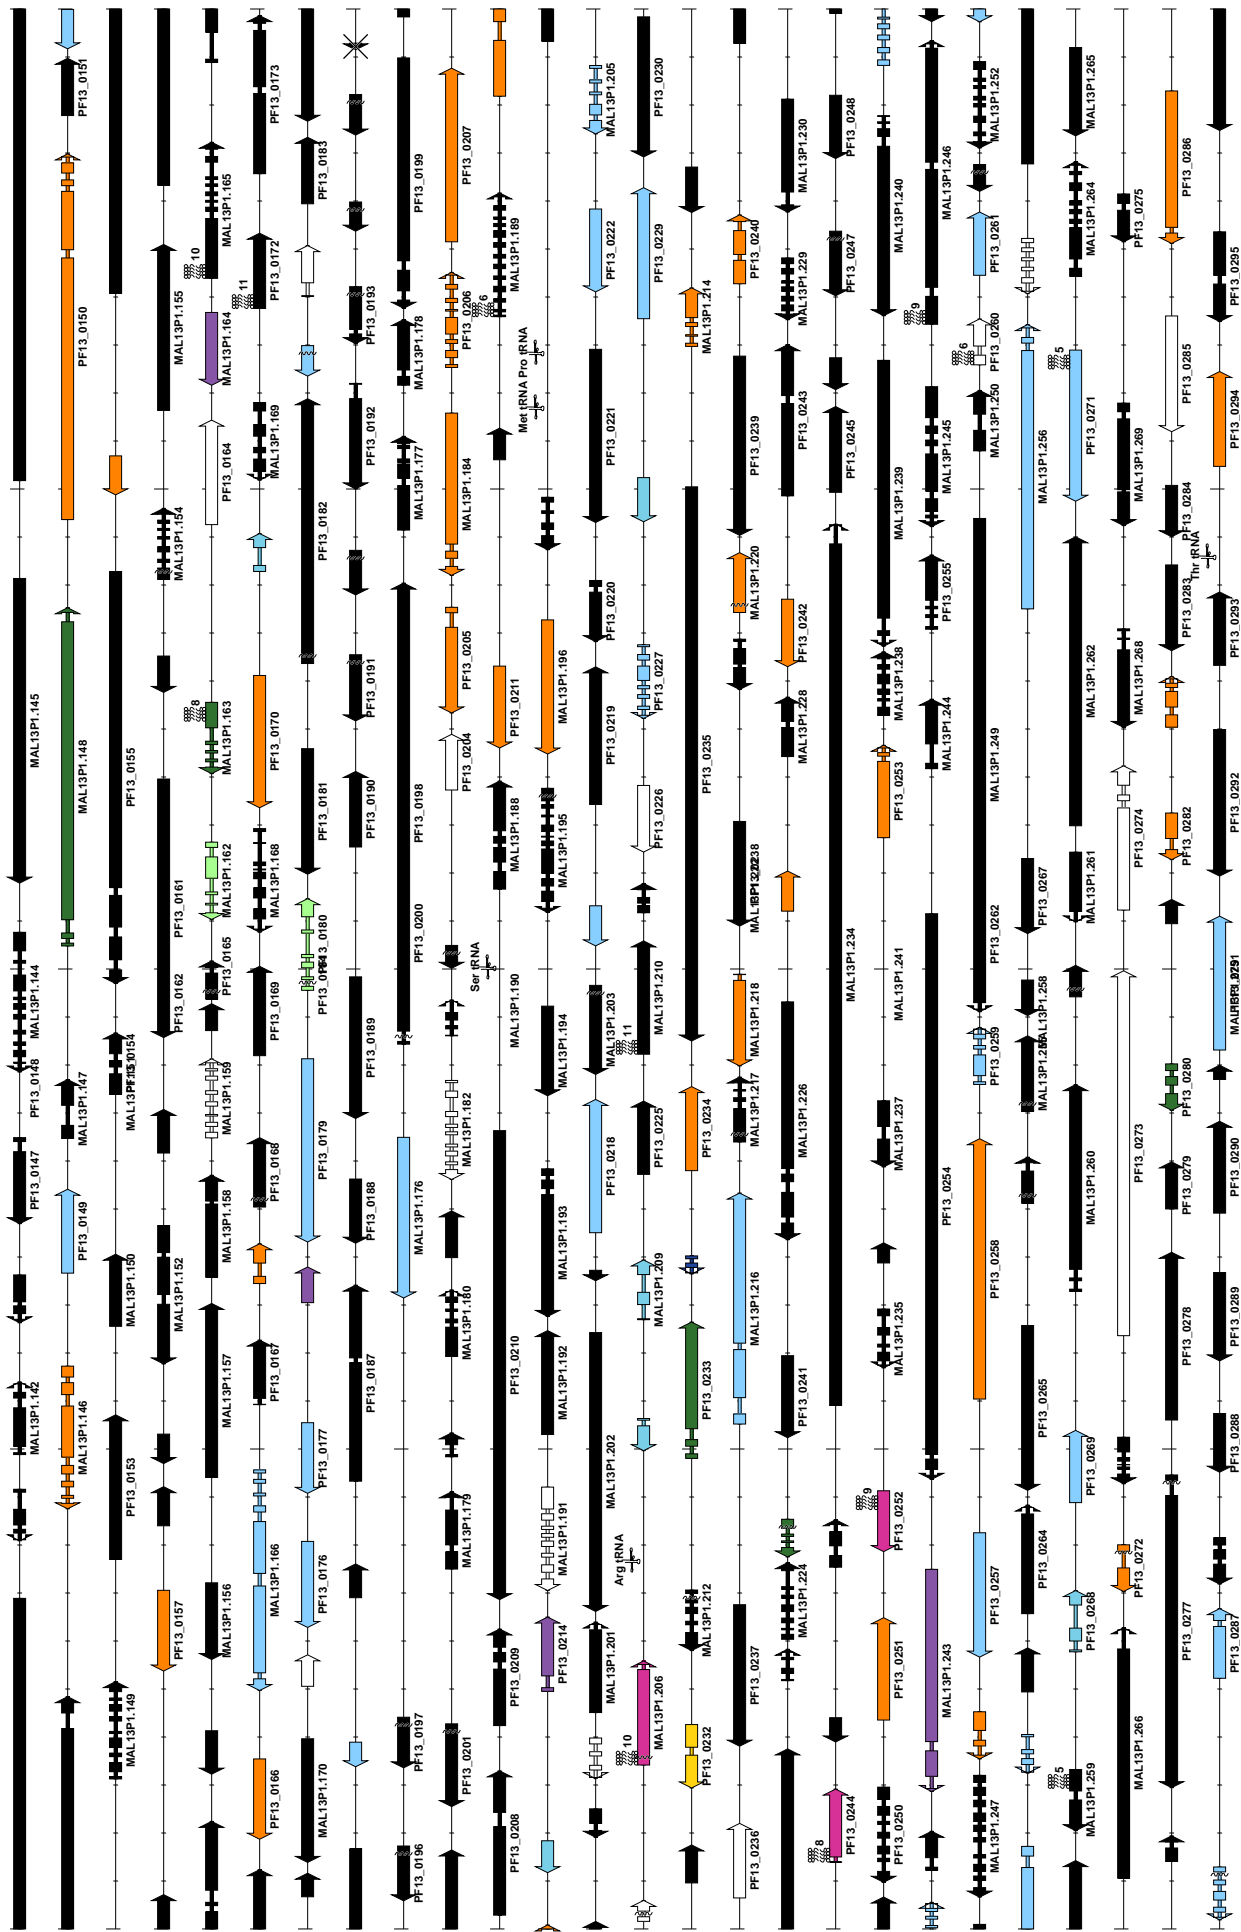

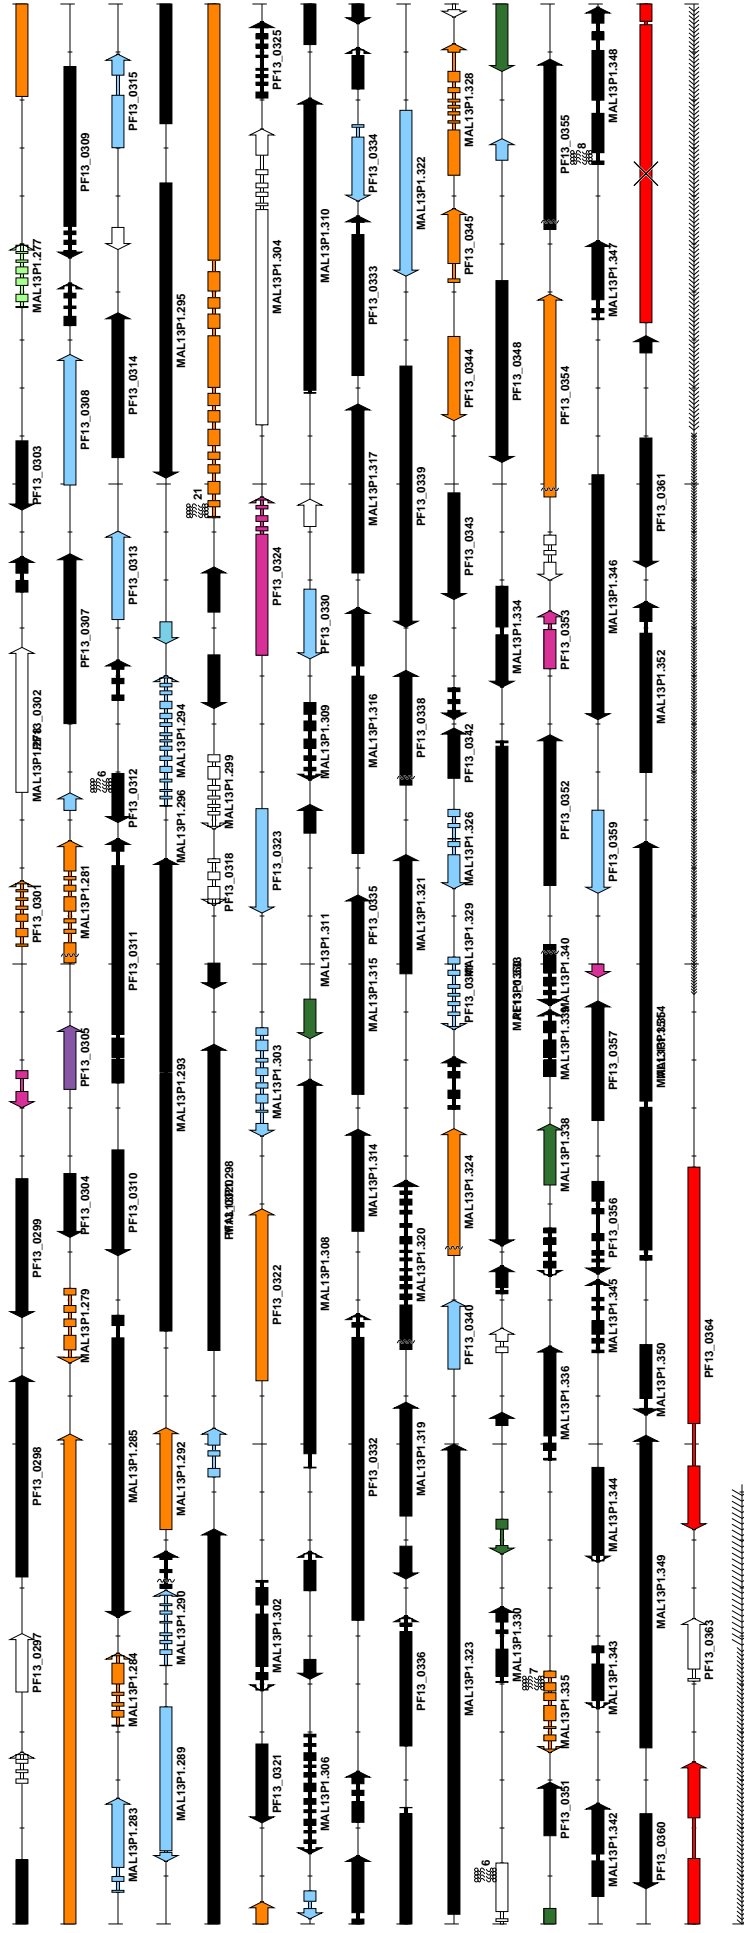

| FUNCTION |                           |
|----------|---------------------------|
|          | enzyme                    |
|          | enzyme regulator          |
|          | defense/immunity protein  |
|          | structural molecule       |
|          | cell adhesion molecule    |
|          | chaperone                 |
|          | transporter               |
|          | other function            |
|          | ligand binding or carrier |
|          | transcription regulator   |
|          | translation regulator     |
|          | no assignment             |

|                                                        |                                     |
|--------------------------------------------------------|-------------------------------------|
| <p>Telomeric regions</p> <p>SB-1<br/>SB-2<br/>SB-3</p> | <p>RNAs</p> <p>tRNA<br/>rRNA</p>    |
| <p>Transmembrane 5 domains</p> <p>5 domains</p>        | <p>Pseudogene</p> <p>Pseudogene</p> |
